# Supplementary material for: Identification of Genomic Regions Contributing to Protein Accumulation in Wheat under Well-Watered and Water Deficit Growth Conditions
Source: MDPI journal article supplement (doi:10.3390/plants7030056), 2018-07-11
Supplement: s1 [file s1]

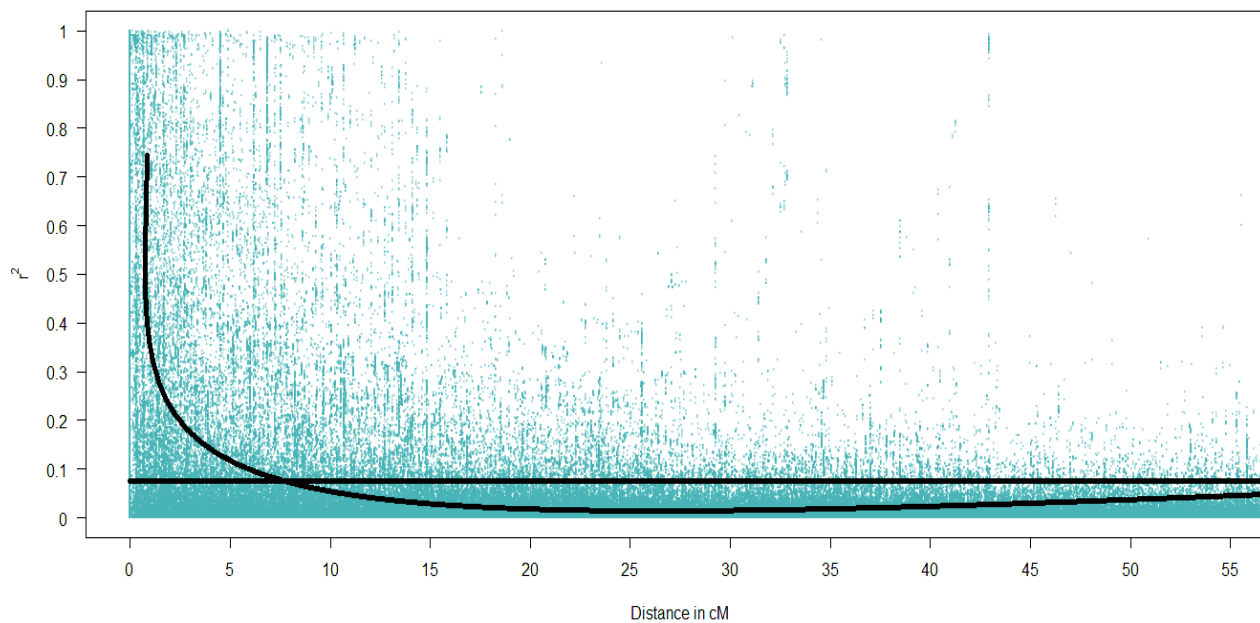

**Figure S1:** Decay of  $r^2$  as a function of genetic distance between SNP markers estimated for 2111 spring wheat collection from different geographic regions.

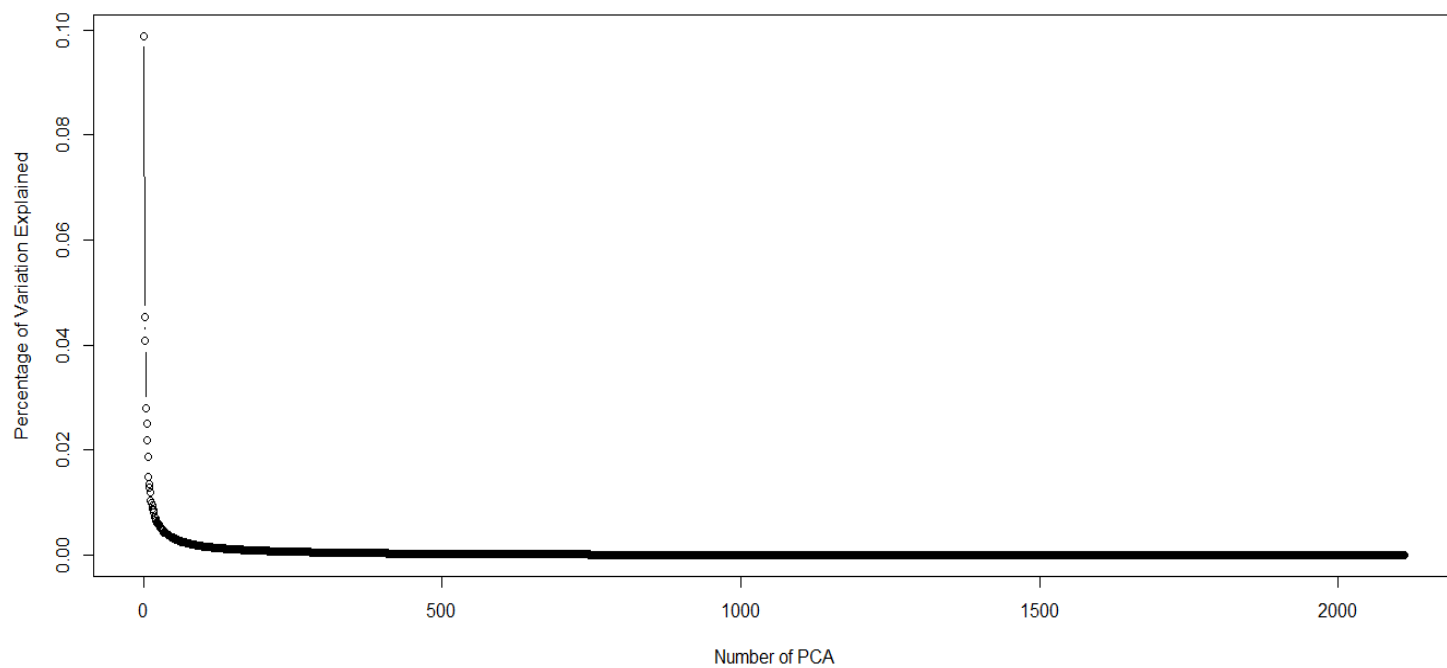

Figure S<sub>2</sub>: The percentage of variance explained by principal components ( PCA)

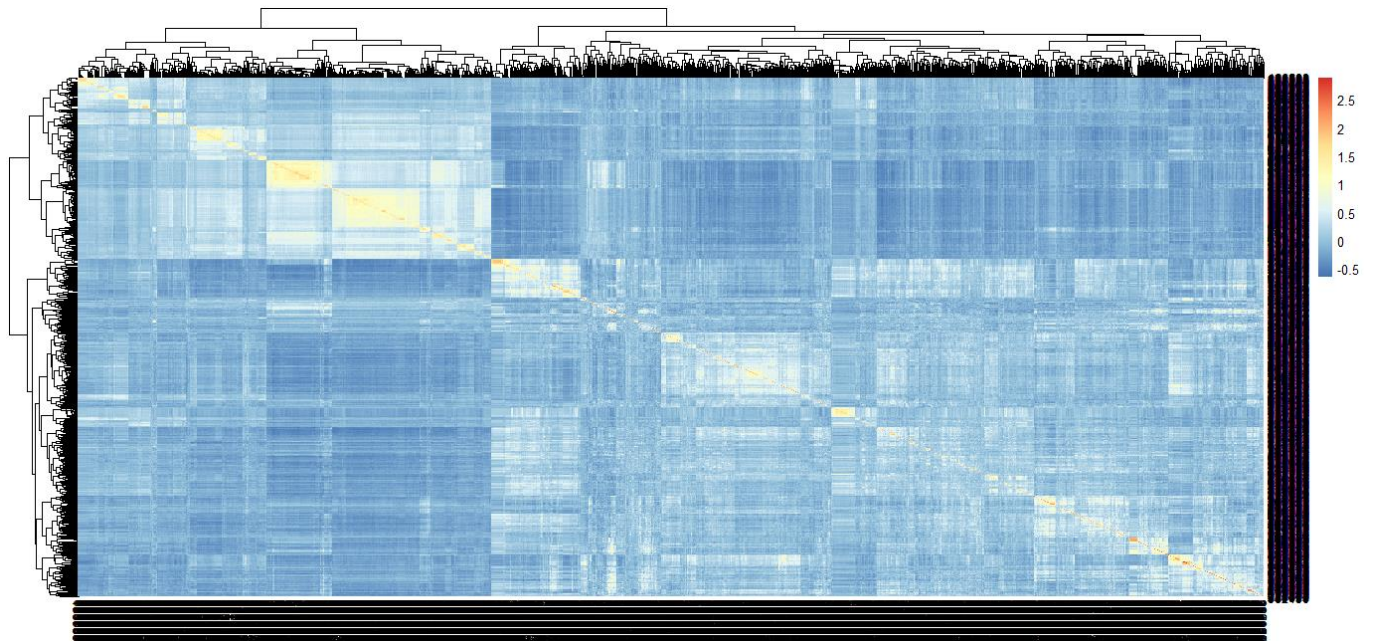

**Figure S<sub>3</sub>:** Heatmap and dendrogram of a kinship matrix estimated using the A.mat function (rrBLUP package) based on 5090 SNPs among 2111 wheat accessions
